# Supplementary material
Source: PubMed Central journal article supplement (PMC4430328)
Supplement: NIHMS685808-supplement-01.pdf [file NIHMS685808-supplement-01.pdf]

Supplementary Table 1. ICD-9-CM Coding Variables.

| Variables                               | ICD-9-CM        |                 |               |        |        |        |        |  |
|-----------------------------------------|-----------------|-----------------|---------------|--------|--------|--------|--------|--|
| <b>Primary Diagnoses</b>                |                 |                 |               |        |        |        |        |  |
| Cirrhosis                               | 571.2           | 571.3           | 571           |        |        |        |        |  |
| Hepatorenal Syndrome                    | 572.4           |                 |               |        |        |        |        |  |
| Hepatocellular carcinoma                | 155             |                 |               |        |        |        |        |  |
| Variceal Hemorrhage                     | 456             | 456.1           | 531.4         | 532.4  | 456.80 | 578.9  | 578    |  |
| Septicemia                              | 995.91          | 995.92          | 995.93        |        |        |        |        |  |
| Cirrhosis due to Alcohol Use            | 571.2           | 571             | 571.3         |        |        |        |        |  |
| <b>Primary Procedures</b>               |                 |                 |               |        |        |        |        |  |
| EGD performed in <24hrs                 | 451.3           | 423.3           | 451.6         |        |        |        |        |  |
| Transfusion given <24hrs                | 99.04           | 99.07           | 99.05         |        |        |        |        |  |
| Paracentesis performed <24hrs           | 549.1           |                 |               |        |        |        |        |  |
| Thoracentesis performed <24 hours       | 349.1           |                 |               |        |        |        |        |  |
| TIPS                                    | 391             |                 |               |        |        |        |        |  |
| <b>Non-Cirrhotic Cohort*</b>            |                 |                 |               |        |        |        |        |  |
| <i>[absence (-) of cirrhosis codes]</i> | <i>(-)571.2</i> | <i>(-)571.3</i> | <i>(-)571</i> |        |        |        |        |  |
| <b>Chronic Heart Failure Cohort*</b>    | 398.91          | 402.11          | 402.91        | 402.11 | 404.13 | 404.91 | 404.93 |  |
|                                         | 428             | 428.1           | 428.2         | 428.21 | 428.22 | 428.23 | 428.3  |  |
|                                         | 428.31          | 428.32          | 428.33        | 428.4  | 428.41 | 428.42 | 428.43 |  |
|                                         | 428.9           |                 |               |        |        |        |        |  |
| <i>[absence (-) of cirrhosis codes]</i> | <i>(-)571.2</i> | <i>(-)571.3</i> | <i>(-)571</i> |        |        |        |        |  |

\*matched 1:1 on age, gender and year of discharge with cirrhosis cohort

**Supplementary Table 2.** Incident Relative Risk (RR) of Inpatient Mortality for Cirrhosis Complications, Sepsis, Early EGD, Early Paracentesis and TIPS by Year of Discharge.

| Interaction term:<br>Variable x Year of Discharge |                      | RR*  | 95%<br>confidence<br>interval | p-value |
|---------------------------------------------------|----------------------|------|-------------------------------|---------|
| Variable                                          | Year of<br>discharge |      |                               |         |
| <b>Hepatorenal syndrome</b>                       | 2002                 | 5.62 | 5.62 - 6.01                   | <0.001  |
| "                                                 | 2003                 | 5.10 | 4.77 - 5.45                   | <0.001  |
| "                                                 | 2004                 | 4.15 | 3.88 - 4.43                   | <0.001  |
| "                                                 | 2005                 | 3.51 | 3.27 - 3.76                   | <0.001  |
| "                                                 | 2006                 | 3.36 | 3.12 - 3.63                   | <0.001  |
| "                                                 | 2007                 | 3.58 | 3.36 - 3.83                   | <0.001  |
| "                                                 | 2008                 | 3.09 | 2.87 - 3.32                   | <0.001  |
| "                                                 | 2009                 | 3.33 | 3.11 - 3.57                   | <0.001  |
| "                                                 | 2010                 | 3.20 | 2.98 - 3.43                   | <0.001  |
| <b>SBP</b>                                        | 2002                 | 1.92 | 1.74 - 2.12                   | <0.001  |
| "                                                 | 2003                 | 1.62 | 1.48 - 1.78                   | <0.001  |
| "                                                 | 2004                 | 1.54 | 1.41 - 1.69                   | <0.001  |
| "                                                 | 2005                 | 1.50 | 1.37 - 1.64                   | <0.001  |
| "                                                 | 2006                 | 1.23 | 1.11 - 1.36                   | <0.001  |
| "                                                 | 2007                 | 1.29 | 1.15 - 1.43                   | <0.001  |
| "                                                 | 2008                 | 1.23 | 1.12 - 1.36                   | <0.001  |
| "                                                 | 2009                 | 1.12 | 0.99 - 1.28                   | 0.078   |
| "                                                 | 2010                 | 1.21 | 1.09 - 1.34                   | 0.000   |
| <b>Hepatocellular carcinoma</b>                   | 2002                 | 1.89 | 1.69 - 2.10                   | <0.001  |
| "                                                 | 2003                 | 1.84 | 1.66 - 2.04                   | <0.001  |
| "                                                 | 2004                 | 1.70 | 1.55 - 1.88                   | <0.001  |
| "                                                 | 2005                 | 1.62 | 1.48 - 1.78                   | <0.001  |
| "                                                 | 2006                 | 1.62 | 1.47 - 1.78                   | <0.001  |
| "                                                 | 2007                 | 1.55 | 1.42 - 1.70                   | <0.001  |
| "                                                 | 2008                 | 1.40 | 1.28 - 1.53                   | <0.001  |
| "                                                 | 2009                 | 1.20 | 1.09 - 1.32                   | <0.001  |
| "                                                 | 2010                 | 1.31 | 1.20 - 1.43                   | <0.001  |
| <b>Variceal hemorrhage</b>                        | 2002                 | 2.06 | 1.93 - 2.21                   | <0.001  |
| "                                                 | 2003                 | 2.04 | 1.91 - 2.18                   | <0.001  |
| "                                                 | 2004                 | 1.66 | 1.56 - 1.77                   | <0.001  |
| "                                                 | 2005                 | 1.68 | 1.57 - 1.81                   | <0.001  |
| "                                                 | 2006                 | 1.59 | 1.49 - 1.69                   | <0.001  |
| "                                                 | 2007                 | 1.57 | 1.47 - 1.67                   | <0.001  |
| "                                                 | 2008                 | 1.49 | 1.39 - 1.60                   | <0.001  |
| "                                                 | 2009                 | 1.55 | 1.45 - 1.66                   | <0.001  |
| "                                                 | 2010                 | 1.53 | 1.43 - 1.64                   | <0.001  |
| <b>Sepsis</b>                                     | 2002                 | 3.62 | 3.32 - 3.95                   | <0.001  |
| "                                                 | 2003                 | 3.78 | 3.51 - 4.07                   | <0.001  |
| "                                                 | 2004                 | 4.48 | 4.26 - 4.71                   | <0.001  |
| "                                                 | 2005                 | 4.49 | 4.27 - 4.71                   | <0.001  |
| "                                                 | 2006                 | 4.51 | 4.31 - 4.71                   | <0.001  |
| "                                                 | 2007                 | 4.34 | 4.14 - 4.55                   | <0.001  |
| "                                                 | 2008                 | 4.99 | 4.76 - 5.23                   | <0.001  |
| "                                                 | 2009                 | 4.65 | 4.44 - 4.88                   | <0.001  |
| "                                                 | 2010                 | 4.63 | 4.41 - 4.86                   | <0.001  |
| <b>EGD ≤ 1 day of admission</b>                   | 2002                 | 0.98 | 0.89 - 1.06                   | 0.575   |
| "                                                 | 2003                 | 0.91 | 0.84 - 0.99                   | 0.037   |
| "                                                 | 2004                 | 0.90 | 0.83 - 0.97                   | 0.007   |
| "                                                 | 2005                 | 0.80 | 0.74 - 0.87                   | <0.001  |
| "                                                 | 2006                 | 0.83 | 0.77 - 0.90                   | <0.001  |
| "                                                 | 2007                 | 0.80 | 0.73 - 0.87                   | <0.001  |
| "                                                 | 2008                 | 0.82 | 0.75 - 0.89                   | <0.001  |
| "                                                 | 2009                 | 0.82 | 0.75 - 0.89                   | <0.001  |
| "                                                 | 2010                 | 0.69 | 0.63 - 0.75                   | <0.001  |
| <b>Paracentesis ≤ 1 day of admission</b>          | 2002                 | 1.29 | 1.19 - 1.40                   | <0.001  |
| "                                                 | 2003                 | 1.22 | 1.13 - 1.32                   | <0.001  |
| "                                                 | 2004                 | 1.02 | 0.95 - 1.10                   | 0.536   |
| "                                                 | 2005                 | 1.06 | 0.98 - 1.13                   | 0.136   |
| "                                                 | 2006                 | 1.09 | 1.03 - 1.15                   | 0.001   |
| "                                                 | 2007                 | 0.93 | 0.86 - 1.00                   | 0.041   |
| "                                                 | 2008                 | 0.93 | 0.86 - 1.00                   | 0.048   |
| "                                                 | 2009                 | 0.91 | 0.84 - 0.98                   | 0.011   |
| "                                                 | 2010                 | 0.87 | 0.81 - 0.94                   | <0.001  |
| <b>TIPS</b>                                       | 2002                 | 1.32 | 1.10 - 1.59                   | 0.003   |
| "                                                 | 2003                 | 1.47 | 1.25 - 1.73                   | <0.001  |
| "                                                 | 2004                 | 1.54 | 1.31 - 1.81                   | <0.001  |
| "                                                 | 2005                 | 1.19 | 0.97 - 1.45                   | 0.089   |
| "                                                 | 2006                 | 1.32 | 1.11 - 1.57                   | 0.002   |
| "                                                 | 2007                 | 1.18 | 0.98 - 1.43                   | 0.084   |
| "                                                 | 2008                 | 1.10 | 0.90 - 1.34                   | 0.348   |
| "                                                 | 2009                 | 1.08 | 0.89 - 1.32                   | 0.446   |
| "                                                 | 2010                 | 1.12 | 0.92 - 1.37                   | 0.262   |

\* see also Figure 3, main text
